# Supplementary material
Source: Frontiers journal article supplement (https://www.frontiersin.org/articles/249392)
Supplement: Data_Sheet_1.pdf [file Data_Sheet_1.pdf]

| Country | Product  | Substance    | Company        | ATC-code | OMP | Start date | End date   | Date of Prolongation | Indication                                                                                                                                                                                                                                           | Financial based (F) or performance-based (P) agreement | Typology     |
|---------|----------|--------------|----------------|----------|-----|------------|------------|----------------------|------------------------------------------------------------------------------------------------------------------------------------------------------------------------------------------------------------------------------------------------------|--------------------------------------------------------|--------------|
| Belgium | Adcetris | Brentuximab  | Takeda Belgium | L01XC12  | 1   | Nov 2014   | Nov 2016   |                      | Relapsed or refractory CD30+ Hodgkin lymphoma (HL), following autologous stem cell transplant (ASCT) or following at least two prior therapies when ASCT or multi-agent chemotherapy is not a treatment option+relapsed or refractory systemic sALCL | Confidential                                           | Confidential |
| Belgium | Avastin  | Bevacizumab  | Roche          | L01XC07  | 0   | Sept 2014  | March 2017 |                      | Colorectal cancer, second line                                                                                                                                                                                                                       | Confidential                                           | Confidential |
| Belgium | Avastin  | Bevacizumab  | Roche          | L01XC07  | 0   | July 2015  | March 2017 |                      | Platinum-resistant recurrent epithelial ovarian cancer, in combination with paclitaxel, topotecan or doxorubicin                                                                                                                                     | Confidential                                           | Confidential |
| Belgium | Avastin  | Bevacizumab  | Roche          | L01XC07  | 0   | March 2014 | March 2017 |                      | Ovarian cancer, 1st line and 2nd line                                                                                                                                                                                                                | Confidential                                           | Confidential |
| Belgium | Caprelsa | Vandetanib   | AstraZeneca    | L01XE12  | 0   | May 2013   | May 2016   |                      | Medullar thyroid gland cancer                                                                                                                                                                                                                        | Confidential                                           | Confidential |
| Belgium | Dacogen  | Decitabine   | Janssen-cilag  | L01BC08  | 1   | Dec 2013   | Dec 2016   |                      | Newly diagnosed de novo or secondary acute myeloid leukaemia (AML) in treatment of adults older than 65years, who are not candidates for standard induction chemotherapy                                                                             | Confidential                                           | Confidential |
| Belgium | Erivedge | Vismodegib   | Roche          | L01XX43  | 0   | Oct 2014   | Oct 2017   |                      | Locally advanced basal cell carcinoma, inappropriate for surgery or radiotherapy and symptomatic metastatic basal cell carcinoma                                                                                                                     | Confidential                                           | Confidential |
| Belgium | Gazyvaro | Obinutuzumab | Roche          | L01XC15  | 1   | Oct 2015   | Oct 2018   |                      | Chronic lymphocytic leukaemia, first line, in combination with chlorambucil, in patients with comorbidities making them                                                                                                                              | Confidential                                           | Confidential |

|         |           |                           |                        |         |   |           |           |                                |                                                                                                                                                                                                                                                   |              |              |
|---------|-----------|---------------------------|------------------------|---------|---|-----------|-----------|--------------------------------|---------------------------------------------------------------------------------------------------------------------------------------------------------------------------------------------------------------------------------------------------|--------------|--------------|
|         |           |                           |                        |         |   |           |           |                                | unsuitable for full-dose fludarabine based therapy                                                                                                                                                                                                |              |              |
| Belgium | Halaven   | Eribulin                  | Eisai europe           | L01XX45 | 0 | Oct 2013  | Oct 2016  |                                | Locally advanced or metastatic breast cancer after at least two chemotherapeutic regimens for advanced disease                                                                                                                                    | Confidential | Confidential |
| Belgium | Imbruvica | Ibrutinib                 | Janssen-cilag          | L01XE27 | 1 | Aug 2015  | Aug 2018  |                                | Relapsed or refractory mantle cell lymphoma + chronic lymphocytic leukaemia, at least 1 prior therapy or in 1st line in presence of 17p deletion or TP53 mutation in patients unsuitable for chemo-immunotherapy                                  | Confidential | Confidential |
| Belgium | Imnovid   | Pomalidomide              | Celgene                | L04AX06 | 1 | Sept 2014 | Sept 2017 |                                | Relapsed and refractory multiple myeloma, after at least two prior treatment regimens including lenalidomide and bortezomib, and a prior treatment with an alkylant, and have demonstrated disease progression on the last therapy                | Confidential | Confidential |
| Belgium | Jevtana   | Cabazitaxel               | Sanofi-aventis Belgium | L01CD04 | 0 | May 2012  | May 2013  | May 2014 + May 2015 + May 2016 | Hormone refractory metastatic prostate cancer, after treatment with a docetaxel-containing regimen                                                                                                                                                | Confidential | Confidential |
| Belgium | Kadcyla   | Ado-trastuzumab Emtansine | Roche                  | L01XC14 | 0 | Dec 2014  | Dec 2017  |                                | HER2-positive, unresectable locally advanced or metastatic breast cancer, after trastuzumab and a taxane, separately or in combination                                                                                                            | Confidential | Confidential |
| Belgium | Lynparza  | Olaparib                  | AstraZeneca            | L01XX47 | 1 | Dec 2015  | Dec 2017  |                                | Platinum-sensitive relapsed BRCA-mutated (germline and/or somatic) high grade serous epithelial ovarian, fallopian tube, or primary peritoneal cancer who are in response (complete response or partial response) to platinum-based chemotherapy. | Confidential | Confidential |
| Belgium | Mabthera  | Rituximab                 | Roche                  | L01XC02 | 0 | Dec 2014  | Jan 2016  |                                | Chronic lymphocytic leukemia, previously untreated, relapsed or refractory, in combination with chemotherapy                                                                                                                                      | Confidential | Confidential |

|         |          |              |                               |         |   |           |           |          |                                                                                                                                                                                                                           |              |              |
|---------|----------|--------------|-------------------------------|---------|---|-----------|-----------|----------|---------------------------------------------------------------------------------------------------------------------------------------------------------------------------------------------------------------------------|--------------|--------------|
| Belgium | Perjeta  | Pertuzumab   | Roche                         | L01XC13 | 0 | June 2014 | June 2017 |          | HER2-positive metastatic or locally recurrent unresectable breast cancer, not received previous anti-HER2 therapy or chemotherapy for their metastatic disease                                                            | Confidential | Confidential |
| Belgium | Revlimid | Lenalidomide | Celgene                       | L04AX04 | 1 | Oct 2014  | Oct 2017  |          | Transfusion-dependent anaemia due to low- or intermediate-1-risk myelodysplastic syndromes associated with an isolated deletion 5q cytogenetic abnormality, when other therapeutic options are insufficient or inadequate | Confidential | Confidential |
| Belgium | Sprycel  | Dasatinib    | Bristol-myers squibb Belgium  | L01XE06 | 1 | Dec 2011  | Dec 2014  | Dec 2015 | Newly diagnosed Philadelphia chromosome-positive (Ph+) chronic myelogenous leukemia (CML) in chronic phase                                                                                                                | Confidential | Confidential |
| Belgium | Torisel  | Temsirolimus | Pfizer                        | L01XE09 | 0 | Sept 2011 | Sept 2014 |          | Relapsed and/or refractory mantle cell lymphoma                                                                                                                                                                           | Confidential | Confidential |
| Belgium | Xalkori  | Crizotinib   | Pfizer                        | L01XE16 | 0 | Aug 2013  | Aug 2016  |          | Previously treated ALK-positive advanced non-small cell lung cancer                                                                                                                                                       | Confidential | Confidential |
| Belgium | Xtandi   | Enzalutamide | Astellas                      | L02BB04 | 0 | Dec 2014  | Dec 2016  |          | Metastatic castration-resistant prostate cancer, progressed on or after docetaxel therapy                                                                                                                                 | Confidential | Confidential |
| Belgium | Xtandi   | Enzalutamide | Astellas Pharma               | L02BB04 | 0 | Oct 2015  | Dec 2016  |          | Metastatic castration resistant prostate cancer in pre chemo (docetaxel) setting                                                                                                                                          | Confidential | Confidential |
| Belgium | Yervoy   | Ipilimumab   | Bristol-Meyers Squibb Belgium | L01XC11 | 0 | June 2015 | June 2016 |          | Treatment of advanced (unresectable or metastatic) melanoma in adults in first line                                                                                                                                       | Confidential | Confidential |
| Belgium | Yervoy   | Ipilimumab   | Bristol-Myers Squibb Belgium  | L01XC11 | 0 | June 2012 | June 2016 |          | Treatment of advanced (unresectable or metastatic) melanoma after prior therapy                                                                                                                                           | Confidential | Confidential |
| Belgium | Zaltrap  | Aflibercept  | Sanofi-Aventis Belgium        | L01XX44 | 0 | Nov 2014  | Nov 2017  |          | Metastatic colorectal cancer that is resistant to or has progressed after an oxaliplatin-containing regimen, in combination with irinotecan/5-                                                                            | Confidential | Confidential |

|         |          |                     |                      |         |   |            |           |          |                                                                                                                                                                                     |              |                                      |
|---------|----------|---------------------|----------------------|---------|---|------------|-----------|----------|-------------------------------------------------------------------------------------------------------------------------------------------------------------------------------------|--------------|--------------------------------------|
|         |          |                     |                      |         |   |            |           |          | fluorouracil/folinic acid (FOLFIRI) chemotherapy                                                                                                                                    |              |                                      |
| Belgium | Zelboraf | Vemurafenib         | Roche                | L01XE15 | 0 | April 2013 | July 2014 | May 2015 | Treatment of non-resectable or metastatic melanoma with BRAF V600 mutation                                                                                                          | Confidential | Confidential                         |
| Belgium | Zytiga   | Abiraterone Acetate | Janssen-cilag        | L02BX03 | 0 | Aug 2012   | Aug 2015  | Aug 2017 | metastatic castration resistant prostate cancer progressed on or after a docetaxel-based chemotherapy regimen, in combination with prednisone or prednisolone                       | Confidential | Confidential                         |
| Belgium | Zytiga   | Abiraterone acetate | Janssen-Cilag        | L02BX03 | 0 | Feb 2014   | Aug 2016  |          | Metastatic castration resistant prostate cancer, asymptomatic or mildly symptomatic after failure of androgen deprivation therapy when chemotherapy is not yet clinically indicated | Confidential | Confidential                         |
| England | Arzerra  | Ofatumumab          | Novartis             | L01XC10 | 1 | June 2015  |           |          | Chronic lymphocytic leukemia, first line, in combination with chlorambucil                                                                                                          | F            | Discount                             |
| England | Gazyvaro | Obinutuzumab        | Roche                | L01XC15 | 1 | June 2015  |           |          | Chronic lymphocytic leukemia, first line                                                                                                                                            | F            | Discount                             |
| England | Giotrif  | Afatinib            | Boehringer Ingelheim | L01XE13 | 0 | April 2014 |           |          | Locally advanced or metastatic non-small cell lung cancer                                                                                                                           | F            | Discount                             |
| England | Inlyta   | Axitinib            | Pfizer               | L01XE17 | 0 | Feb 2015   |           |          | Advanced renal cell carcinoma after failure of prior systemic treatment                                                                                                             | F            | Discount                             |
| England | Iressa   | Gefitinib           | AstraZeneca          | L01XE02 | 0 | July 2010  |           |          | Locally advanced or metastatic non-small-cell lung cancer, first line                                                                                                               | F            | Free/discounted treatment initiation |
| England | Keytruda | Pembrolizumab       | Merck Sharp & Dohme  | L01XC18 | 0 | Nov 2015   |           |          | Advanced melanoma not previously treated with ipilimumab                                                                                                                            | F            | Discount                             |

|         |          |               |                     |         |   |            |                                                                                                        |   |                                      |
|---------|----------|---------------|---------------------|---------|---|------------|--------------------------------------------------------------------------------------------------------|---|--------------------------------------|
| England | Keytruda | Pembrolizumab | Merck Sharp & Dohme | L01XC18 | 0 | Oct 2015   | Advanced melanoma after disease progression with ipilimumab                                            | F | Discount                             |
| England | Mepact   | Mifamurtide   | Takeda              | L03AX01 | 1 | Oct 2011   | High grade, non-metastatic osteosarcoma after surgical resection                                       | F | Discount                             |
| England | Pixuvri  | Pixantrone    | CTI life sciences   | L01DB11 | 0 | Feb 2014   | Relapsed or refractory aggressive non-hodgkin lymphoma                                                 | F | Discount                             |
| England | Revlimid | Lenalidomide  | Celgene             | L04AX04 | 1 | Sept 2014  | Myelodysplastic syndromes with an isolated deletion 5q cytogenetic abnormality                         | F | Patient utilisation cap              |
| England | Sutent   | Sunitinib     | Pfizer              | L01XE04 | 0 | March 2009 | Unresectable or metastatic malignant gastro-intestinal tumor (GIST)                                    | F | Free/discounted treatment initiation |
| England | Sutent   | Sunitinib     | Pfizer              | L01XE04 | 0 | March 2009 | First line treatment of advanced/metastatic renal cell carcinoma                                       | F | Free/discounted treatment initiation |
| England | Tafinlar | Dabrafenib    | GSK                 | L01XE23 | 0 | Oct 2014   | Unresectable or metastatic melanoma with BRAFV600 mutation                                             | F | Discount                             |
| England | Tarceva  | Erlotinib     | Roche               | L01XE03 | 0 | Dec 2015   | Non-small-cell lung cancer that has progressed after prior chemotherapy                                | F | Discount                             |
| England | Tarceva  | Erlotinib     | Roche               | L01XE03 | 0 | June 2012  | Locally advanced and metastatic positive non- small-cell lung cancer with EGFR-TK mutation, first line | F | Discount                             |
| England | Tasigna  | Nilotinib     | Novartis            | L01XE08 | 1 | Dec 2015   | Chronic myeloid leukemia, first line                                                                   | F | Discount                             |
| England | Tasigna  | Nilotinib     | Novartis            | L01XE08 | 1 | June 2012  | Chronic myeloid leukemia resistant to imatinib                                                         | F | Discount                             |

|                 |          |              |                      |         |   |            |                                                                                                      |   |                         |
|-----------------|----------|--------------|----------------------|---------|---|------------|------------------------------------------------------------------------------------------------------|---|-------------------------|
| England         | Vargatef | nintedanib   | Boehringer Ingelheim | L01XE31 | 0 | July 2015  | Previsouly treated locally advanced metastatic or locally recurrent non-small cell lung cancer       | F | Discount                |
| England         | Vidaza   | Azacitidine  | Celgene              | L01BC07 | 1 | March 2011 | Myelodysplastic syndrome, chronic myelodysplastic leukemia and acute myeloid leukemia                | F | Discount                |
| England         | Votrient | Pazopanib    | GSK                  | L01XE11 | 0 | Feb 2011   | Advanced renal cell carcinoma, first line                                                            | F | Discount                |
| England         | Yervoy   | Ipilimumab   | Bristol-Myers Squibb | L01XC11 | 0 | July 2014  | Advanced (unresectable or metastatic) melanoma, first line                                           | F | Discount                |
| England         | Yervoy   | Ipilimumab   | Bristol-Myers Squibb | L01XC11 | 0 | July 2014  | Advanced (unresectable or metastatic) melanoma, second line                                          | F | Discount                |
| England         | Yondelis | Trabectedin  | PharmaMar            | L01XE01 | 1 | 2010       | Advanced tissue sarcoma                                                                              | F | Patient utilisation cap |
| England         | Zelboraf | Vemurafenib  | Roche                | L01XE15 | 0 | Dec 2012   | Locally advanced (unresectable or metastatic) malignant myeloma, positive for BRAF V600 mutation     | F | Discount                |
| England & Wales | Erbitux  | Cetuximab    | Merck                | L01XC06 | 0 | Sept 2009  | Metastatic colorectal cancer, first line                                                             | F | Discount                |
| England & Wales | Revlimid | Lenalidomide | Celgene              | L04AX04 | 1 | June 2009  | Multiple myeloma after at least two other treatments                                                 | F | Patient utilisation cap |
| England & Wales | Xtandi   | Enzalutamide | Astellas Pharma      | L02BB04 | 0 | July 2014  | Metastatic hormone relapsed prostate cancer, progressed during or after docetaxel                    | F | Discount                |
| England & Wales | Zytiga   | Abiraterone  | Janssen-cilag        | L02BX03 | 0 | June 2012  | Castration resistant metastatic prostate cancer previously treated with docetaxel-containing regimen | F | Discount                |

|       |          |                     |            |         |   |            |           |                                                                                                                                                                                                |     |                                     |
|-------|----------|---------------------|------------|---------|---|------------|-----------|------------------------------------------------------------------------------------------------------------------------------------------------------------------------------------------------|-----|-------------------------------------|
| Italy | Abraxane | Paclitaxel-albumine | Celgene    | L01CD01 | 0 | Feb 2015   |           | Pancreatic neoplasms, in association with gemcitabine                                                                                                                                          | P   | Money-back guarantee                |
| Italy | Adcetris | Brentuximab         | Takeda     | L01XC13 | 1 | Nov 2012   | July 2014 | Non-Hodgkin lymphoma                                                                                                                                                                           | P   | Money-back guarantee                |
| Italy | Adcetris | Brentuximab         | Takeda     | L01XC14 | 1 | Nov 2012   | July 2014 | Hodgkin lymphoma                                                                                                                                                                               | P   | Money-back guarantee                |
| Italy | Afinitor | Everolimus          | Novartis   | L04AA18 | 0 | July 2013  |           | Breast neoplasms                                                                                                                                                                               | P   | Money-back guarantee                |
| Italy | Afinitor | Everolimus          | Novartis   | L04AA18 | 0 | June 2010  |           | Renal cell carcinoma                                                                                                                                                                           | P   | Money-back guarantee                |
| Italy | Afinitor | Everolimus          | Novartis   | L04AA18 | 0 | Dec 2012   |           | Pancreatic neoplasms                                                                                                                                                                           | P   | Money-back guarantee                |
| Italy | Alimta   | Pemetrexed          | Elli Lilly | L01BA04 | 0 | May 2009   | July 2014 | Locally advanced or metastatic non-small cell lung cancer, in combination with cisplatina for first line, maintance treatment or second line treatment                                         | P   | Money-back guarantee                |
| Italy | Avastin  | Bevacizumab         | Roche      | L01XC07 | 0 | Oct 2005   | July 2014 | Colorectal carcinoma 2nd line                                                                                                                                                                  | P   | Money-back guarantee                |
| Italy | Avastin  | Bevacizumab         | Roche      | L01XC07 | 0 | April 2014 |           | Platina sensitive epithelial ovarian neoplasms, previously treated with bevacizumab or other products targeting VEGFR, in combination with carboplatin and gemcitabine, 1ste line and 2nd line | P   | Money-back guarantee                |
| Italy | Avastin  | Bevacizumab         | Roche      | L01XC07 | 0 | July 2008  | July 2014 | Breast neoplasms                                                                                                                                                                               | P+F | Dose capping + money-back guarantee |

|       |           |             |                      |         |   |           |           |                                                                                                                                                                                                                                                                     |     |                                     |
|-------|-----------|-------------|----------------------|---------|---|-----------|-----------|---------------------------------------------------------------------------------------------------------------------------------------------------------------------------------------------------------------------------------------------------------------------|-----|-------------------------------------|
| Italy | Avastin   | Bevacizumab | Roche                | L01XC07 | 0 | July 2008 | July 2014 | Renal cell carcinoma                                                                                                                                                                                                                                                | P+F | Dose capping + money-back guarantee |
| Italy | Avastin   | Bevacizumab | Roche                | L01XC07 | 0 | July 2008 | July 2014 | Non-small-cell Lung Carcinoma                                                                                                                                                                                                                                       | P+F | Dose capping + money-back guarantee |
| Italy | Bosulif   | Bosutinib   | Pfizer               | L01XE14 | 1 | Oct 2014  |           | Philadelphia-chromosome positive chronic myeloid leukemia (Ph + CML) in chronic phase, acceleration phase and blast phase, previously treated with one or more tyrosine kinase inhibitors and not appropriate for treatment with imatinib, nilotinib and dasatinib. | P   | Money-back guarantee                |
| Italy | Erbix     | Cetuximab   | Eli Lilly            | L01XC06 | 0 | Dec 2010  |           | Head and neck neoplasms                                                                                                                                                                                                                                             | P   | Money-back guarantee                |
| Italy | Erbix     | Cetuximab   | Eli Lilly            | L01XC06 | 0 | Oct 2008  | Oct 2014  | Metastatic colorectal carcinoma with expression of EGFR and without RAS mutations. In combination with irinotecan, FOLFOX or monotherapy when intolerant or unresponsive for irinotecan                                                                             | P   | Money-back guarantee                |
| Italy | Giotrif   | Afatinib    | Boehringer Ingelheim | L01XE13 | 0 | Dec 2014  |           | Non-small-cell lung carcinoma                                                                                                                                                                                                                                       | P   | Money-back guarantee                |
| Italy | Halaven   | Erbulin     | Eisai                | L01XX45 | 0 | Jan 2012  | May 2015  | Locally advanced breast cancer after at least two treatments with anthracycline and taxanes                                                                                                                                                                         | P   | Money-back guarantee                |
| Italy | Herceptin | Trastuzumab | Genentech            | L01XC03 | 0 | Jan 2011  |           | Stomach neoplasms                                                                                                                                                                                                                                                   | P   | Money-back guarantee                |
| Italy | Iclusig   | Ponatinib   | Ariad                | L01XE24 | 1 | Dec 2014  |           | Lymphoid and myeloid leukemia                                                                                                                                                                                                                                       | P   | Money-back guarantee                |



|       |          |                       |              |         |   |           |           |                                                                                                    |   |                                      |
|-------|----------|-----------------------|--------------|---------|---|-----------|-----------|----------------------------------------------------------------------------------------------------|---|--------------------------------------|
| Italy | Inlyta   | Axitinib              | Pfizer       | L01XE17 | 0 | Jan 2014  |           | Renal cell carcinoma after failure of previous treatment with sunitib or a cytokine                | P | Money-back guarantee                 |
| Italy | Iressa   | Gefitinib             | AstraZeneca  | L01XE02 | 0 | June 2010 |           | Non-small-cell lung carcinoma                                                                      | P | Money-back guarantee                 |
| Italy | Javlor   | Vinflunine            | Pierre Fabre | L01CA05 | 0 | Jan 2011  |           | Monotherapy for urothelial advanced or metastatic cell carcinoma after platinum consisting therapy | P | Money-back guarantee                 |
| Italy | Kadcyla  | Trastuzumab emtansine | Roche        | L01XC14 | 0 | Oct 2014  |           | Breast neoplasm                                                                                    | P | Money-back guarantee                 |
| Italy | Mozobil  | Plerixafor            | Genzyme      | L03AX16 | 1 | Dec 2011  | July 2015 | Lymphoma and multiple myeloma, in combination with G-CSF for                                       | P | Money-back guarantee                 |
| Italy | Nexavar  | Sorafenib             | Bayer        | L01XE05 | 1 | July 2008 | Feb 2016  | Hepatocellular carcinoma                                                                           | P | Money-back guarantee                 |
| Italy | Adcetris | Brentuximab           | Takeda       | L01XC12 | 1 | July 2014 |           | Hodgkin Disease, relapsed after ASCT or refractory to ASCT                                         | F | Free/discounted treatment initiation |
| Italy | Adcetris | Brentuximab           | Takeda       | L01XC13 | 1 | July 2014 |           | Non-Hodgkin lymphoma                                                                               | F | Free/discounted treatment initiation |
| Italy | Arzerra  | Ofatumumab            | Novartis     | L01XC10 | 1 | June 2011 |           | Chronic lymphocytic B-cell leukemia                                                                | F | Free/discounted treatment initiation |
| Italy | Avastin  | Bevacizumab           | Roche        | L01XC07 | 0 | Oct 2005  | July 2014 | Colorectal carcinoma, first line                                                                   | F | Free/discounted treatment initiation |
| Italy | Caprelsa | Vandetanib            | AstraZeneca  | L01XE12 | 0 | July 2013 |           | Thyroid neoplasms                                                                                  | F | Free/discounted treatment initiation |

|       |          |              |               |         |   |            |            |                                                                                                                                     |   |                                      |
|-------|----------|--------------|---------------|---------|---|------------|------------|-------------------------------------------------------------------------------------------------------------------------------------|---|--------------------------------------|
| Italy | Dacogen  | Decitabine   | Jansen-cilag  | L01BC08 | 1 | Nov 2014   |            | Acute myeloid leukemia in patients older than 65 years                                                                              | F | Free/discounted treatment initiation |
| Italy | Erivedge | Vismodegib   | Genentech     | L01XX43 | 0 | April 2015 |            | Symptomatic, metastatic basal cell carcinoma and locally advanced basal cell carcinoma where surgery or radiation are inappropriate | F | Free/discounted treatment initiation |
| Italy | Nexavar  | Sorafenib    | Bayer         | L01XE05 | 1 | Nov 2006   | Feb 2016   | Renal cell carcinoma                                                                                                                | F | Free/discounted treatment initiation |
| Italy | Removab  | Catumaxomab  | Neovi Biotech | L01XC09 | 0 | Oct 2011   | Feb 2016   | Maligne Ascites positive for epCAM                                                                                                  | F | Free/discounted treatment initiation |
| Italy | Revlimid | Lenalidomide | Celgene       | L04AX04 | 1 | March 2008 |            | Myelodysplastic syndromes                                                                                                           | F | Free/discounted treatment initiation |
| Italy | Sprycel  | Dasatinib    | BMS           | L01XE06 | 1 | May 2007   | Oct 2008   | Myelogenous, Chronic, BCR-ABL Positive Precursor Cell Lymphoblastic Leukemia-Lymphoma                                               | F | Free/discounted treatment initiation |
| Italy | Sprycel  | Dasatinib    | BMS           | L01XE06 | 1 | Dec 2011   |            | Myelogenous, Chronic, BCR-ABL Positive Precursor Cell Lymphoblastic Leukemia-Lymphoma, first line                                   | F | Free/discounted treatment initiation |
| Italy | Tafinlar | Dabrafenib   | Novartis      | L01XE23 | 0 | Nov 2014   | April 2015 | Melanoma positive for BRAF V-600                                                                                                    | P | Money-back guarantee                 |
| Italy | Sutent   | Sunitinib    | Pfizer        | L01XE04 | 0 | Oct 2007   |            | Advanced renal cell carcinoma                                                                                                       | F | Free/discounted treatment initiation |
| Italy | Tarceva  | Erlotinib    | Roche         | L01XE03 | 0 | July 2006  | May 2013   | Non-small-cell lung carcinoma, first line                                                                                           | F | Free/discounted treatment initiation |
| Italy | Tarceva  | Erlotinib    | Roche         | L01XE03 | 0 | May 2013   | July 2015  | Non-small-cell lung carcinoma, further lines                                                                                        | F | Free/discounted treatment initiation |

|       |          |              |                 |         |   |           |           |                                                                                                                        |   |                                      |
|-------|----------|--------------|-----------------|---------|---|-----------|-----------|------------------------------------------------------------------------------------------------------------------------|---|--------------------------------------|
| Italy | Tasigna  | Nilotinib    | Novartis        | L01XE08 | 1 | Dec 2011  |           | Chronic myelogenous Leukemia positive for BCR-ABL , first line                                                         | F | Free/discounted treatment initiation |
| Italy | Torisel  | Temsirolimus | Pfizer          | L01XE09 | 0 | Aug 2011  |           | Mantle cell lymphoma, refractory or relapsed                                                                           | F | Free/discounted treatment initiation |
| Italy | Velcade  | Bortezomib   | Janssen-cilag   | L01XX02 | 0 | July 2009 | July 2015 | Multiple myeloma                                                                                                       | F | Free/discounted treatment initiation |
| Italy | Vidaza   | Azacitidina  | Celgene         | L01BC07 | 1 | Nov 2010  |           | Myelodysplastic Syndromes                                                                                              | F | Free/discounted treatment initiation |
| Italy | Vidaza   | Azacitidina  | Celgene         | L01BC07 | 1 | Nov 2010  |           | Chronic myelomonocytic leukaemia                                                                                       | F | Free/discounted treatment initiation |
| Italy | Vidaza   | Azacitidina  | Celgene         | L01BC07 | 1 | Nov 2010  |           | Acute myeloid leukaemia                                                                                                | F | Free/discounted treatment initiation |
| Italy | Votrient | Pazopanib    | GSK             | L01XE11 | 0 | July 2013 |           | Soft tissue sarcoma in advanced stage, previously treated with chemotherapy                                            | F | Free/discounted treatment initiation |
| Italy | Tasigna  | Nilotinib    | Novartis        | L01XE08 | 1 | Aug 2008  |           | Chronic myelogenous leukemia, positive for BCR-ABL and resistant or intolerant to imatinib, second line                | P | Money-back guarantee                 |
| Italy | Votrient | Pazopanib    | GSK             | L01XE11 | 0 | May 2011  |           | Renal cell carcinoma, first line and second line treatment for advanced stage previously treated with cytokine therapy | F | Free/discounted treatment initiation |
| Italy | Torisel  | Temsirolimus | Pfizer          | L01XE09 | 0 | Oct 2008  |           | Renal cell carcinoma                                                                                                   | P | Money-back guarantee                 |
| Italy | Xtandi   | Enzalutamide | Astellas Pharma | L02BB04 | 0 | Dec 2014  |           | Prostatic neoplasms, metastatic and resistant to castration and docetaxel                                              | F | Free/discounted treatment initiation |

|       |          |                     |                      |         |   |            |           |                                                                                                                                                                   |   |                                      |
|-------|----------|---------------------|----------------------|---------|---|------------|-----------|-------------------------------------------------------------------------------------------------------------------------------------------------------------------|---|--------------------------------------|
| Italy | Tyverb   | Lapatinib           | GSK                  | L01XE07 | 0 | June 2011  |           | Breast neoplasms, 1st line                                                                                                                                        | P | Money-back guarantee                 |
| Italy | Tyverb   | Lapatinib           | GSK                  | L01XE07 | 0 | June 2009  |           | Breast neoplasm, 2nd line                                                                                                                                         | P | Money-back guarantee                 |
| Italy | Zaltrap  | Aflibercept         | Regeneron            | L01XX44 | 0 | Oct 2014   |           | Metastatic colon cancer, resistant or progressed after oxaliplatin containing regimen, in combination with irinotecan-based therapy/ 5-fluorouracil/folinic acid  | F | Free/discounted treatment initiation |
| Italy | Zytiga   | Abiraterone acetate | Jansen-cilag         | L02BX03 | 0 | April 2013 |           | Metastatic castration-resistant prostate cancer in advanced stage or after docetaxel-based chemotherapy, in combination with prednisone or prednisolone, 1st line | F | Free/discounted treatment initiation |
| Italy | Vectibix | Panitumumab         | Amgen                | L01XC08 | 0 | Jan 2009   | June 2014 | Monotherapy for metastatic colon cancer with expression of EGFR after fluoropyrimidine, oxaliplatin and irinotecan in tumours with WT KRAS                        | P | Money-back guarantee                 |
| Italy | Xalkori  | Crizotinib          | Pfizer               | L01XE16 | 0 | April 2015 |           | Non-small-cell lung carcinoma positive for ALK in advanced stage                                                                                                  | P | Money-back guarantee                 |
| Italy | Yervoy   | Ipilimumab          | Bristol Myers Squibb | L01XC11 | 0 | March 2013 | Sep 2014  | Advanced (inoperable or metastatic) melanoma                                                                                                                      | P | Money-back guarantee                 |
| Italy | Yondelis | Trabectedin         | Pharma Mar           | L01XC01 | 1 | Feb 2009   |           | Advanced soft tissue sarcoma, unsuitable or irresponsive to antracycline and ifosfamide                                                                           | P | Money-back guarantee                 |
| Italy | Yondelis | Trabectedin         | Pharma Mar           | L01XC01 | 1 | April 2011 |           | Platina-sensitive ovarian carcinoma in, relapsed, combination with pegylated liposomal doxorubicin                                                                | P | Money-back guarantee                 |
| Italy | Zelboraf | Vemurafenib         | Roche                | L01XE15 | 0 | June 2013  | Nov 2015  | Monotherapy for irresistible or metastatic melanoma with BRAF V600 mutation                                                                                       | P | Money-back guarantee                 |

|          |         |                     |                                 |         |   |            |                                                                                                                                                                                                                                                                                                                                                                                        |   |                      |
|----------|---------|---------------------|---------------------------------|---------|---|------------|----------------------------------------------------------------------------------------------------------------------------------------------------------------------------------------------------------------------------------------------------------------------------------------------------------------------------------------------------------------------------------------|---|----------------------|
| Italy    | Zytiga  | abiraterone acetate | Jansen-cilag                    | L02BX03 | 0 | April 2013 | Metastatic castration-resistant prostate cancer in after adrogendeprivate therapy, 2nd line                                                                                                                                                                                                                                                                                            | P | Money-back guarantee |
| Scotland | Arzerra | Ofatumumab          | Novartis Pharmaceuticals UK Ltd | L01XC10 | 1 | April 2015 | Chronic lymphocytic leukemia, not previously treated or not eligible for fludarabine based therapy, in combination with chlorambucil or bendamustine                                                                                                                                                                                                                                   | F | Discount             |
| Scotland | Velcade | bortezomib          | Janssen-Cilag                   | L01XX02 | 0 | Nov 2009   | Monotherapy for the treatment of progressive multiple myeloma, treated with at least one prior theapy and already undergone or unsuitable for bone marrow transplantation                                                                                                                                                                                                              | P | Outcomes guarantee   |
| Scotland | Avastin | Bevacizumab         | Roche                           | L01XC07 | 0 | Aug 2015   | Platinum resistant recurrent epithelial ovarian, fallopian tube, or primay peritoneal cancer, who received no more than two prior chemotherapy regimes and who have not received prior therapy with bevacizumab or other vascular endothelial growth factor inhibitors or VEGF receptor targeted agents, in combination with paclitaxel, topotecan, or pegylated liposomal doxorubicin | F | Discount             |
| Scotland | Bosulif | Bosutinib           | Pfizer                          | L01XE14 | 0 | Feb 2015   | Chronic phase, accelerated phase and blast phase philadelphia positive chronic myelogenous leukemia, previously treated with one or more tyrosine kinase inhibitors and for whom imatinib, nilotinib and dasatinib are not conisdered appropriate treatment options                                                                                                                    | F | Discount             |
| Scotland | Erbitux | Cetuximab           | Merck Serono                    | L01XC06 | 0 | Jan 2010   | Epidermal growth factor receptor expressing, Kirsten rat sarcoma wild-type metastatic colorectal cancer in combination with chemotherapy                                                                                                                                                                                                                                               | F | Discount             |
| Scotland | Erbitux | Cetuximab           | Merck Serono                    | L01XC06 | 0 | Jan 2015   | EGFR expressing, RAS wildtype metastatic colorectal cancer                                                                                                                                                                                                                                                                                                                             | F | Discount             |

|          |          |               |                         |         |   |            |                                                                                                                                                                                                                                               |     |                                               |
|----------|----------|---------------|-------------------------|---------|---|------------|-----------------------------------------------------------------------------------------------------------------------------------------------------------------------------------------------------------------------------------------------|-----|-----------------------------------------------|
| Scotland | Firmagon | Degarelix     | Ferring Pharmaceuticals | L02BX02 | 0 | Nov 2010   | Advanced hormone-dependent prostate cancer                                                                                                                                                                                                    | F   | Discount                                      |
| Scotland | Giotrif  | Afatinib      | Boehringer-Ingelheim    | L01XE13 | 0 | March 2014 | EGFR tyrosine kinase inhibitor naive adults, with locally advanced or metastatic NSCLC with activating EGFR mutations                                                                                                                         | F   | Discount                                      |
| Scotland | Halavan  | Eribulin      | Eisai                   | L01XX45 | 0 | Feb 2016   | Locally advanced or metastatic breast cancer , progressed after at least one chemotherapeutic regimen for advanced disease and prior treated with anthracycline and a taxane in either the adjuvant or metastatic setting unless not suitable | F   | Discount                                      |
| Scotland | Imnovid  | Pomalidomide  | Celgene                 | L04AX06 | 1 | Dec 2014   | Relapsed and refractory multiple myeloma after at least two prior treatment regimes, including lenalidomide and bortezomib, and demonstraed disease progression on the lastest therapy, in combination with dexamethasone                     | F   | Discount                                      |
| Scotland | Inlyta   | Axitinib      | Pfizer                  | L01XE17 | 0 | Nov 2013   | Advanced renal cell carcinoma after failure of prior treatment with sunitinib or a cytokine                                                                                                                                                   | F   | Discount                                      |
| Scotland | Iressa   | Gefitinib     | AstraZeneca             | L01XE02 | 0 | Nov 2015   | Locally advanced or metastatic non-small cell lung cancer (NSCLC) with activating mutations of epidermal growth factor receptor tyrosine kinase (EGFR-TK)                                                                                     | F   | Discount                                      |
| Scotland | Votrient | Pazopanib     | GSK                     | L01XE11 | 0 | Feb 2013   | First-line treatment of advanced renal cell carcinoma for patients who have received prior cytokne therapy for advanced disease                                                                                                               | F+P | Discount + coverage with evidence development |
| Scotland | Keytruda | Pembrolizumab | Merck Shapr and Dhome   | L01XC18 | 0 | Oct 2015   | Monotherapy for the treatment of advanced (unresectable or metastatic) melanoma, previously untreated with ipilimumab                                                                                                                         | F   | Discount                                      |
| Scotland | Mabthera | Rituximab     | Roche                   | L01XC02 | 0 | July 2014  | Non-hodgkin's lymphoma                                                                                                                                                                                                                        | F   | Discount                                      |

|          |          |             |                      |         |   |            |                                                                                                                                                                  |   |                                      |
|----------|----------|-------------|----------------------|---------|---|------------|------------------------------------------------------------------------------------------------------------------------------------------------------------------|---|--------------------------------------|
| Scotland | Mepact   | Mifamurtide | takeda               | L03AX01 | 1 | Aug 2011   | high-grade resectable non-metastatic osteosarcoma after macroscopically complete surgical resection, in combination with post-operative multi-agent chemotherapy | F | Discount                             |
| Scotland | Nexavar  | Sorafenib   | Bayer                | L01XE05 | 1 | June 2015  | Progressive, locally advanced or metastatic, differentiated thyroid carcinoma, refractory to radioactive iodine                                                  | F | Discount                             |
| Scotland | Stivarga | Regorafenib | Bayer                | L01XE21 | 0 | April 2015 | Unresectable or metastatic gastrointestinal stromal tumors who progressed on or are intolerant to prior treatment with imatinib and sunitinib                    | F | Discount                             |
| Scotland | Sutent   | Sunitinib   | Pfizer               | L01XE04 | 0 | Oct 2009   | Unresectable and metastatic malignant GIST after failure of imatinib mesilate treatment due to resistance or intolerance                                         | F | Free/discounted treatment initiation |
| Scotland | Sutent   | Sunitinib   | Pfizer               | L01XE04 | 0 | April 2011 | Treatment of unresectable or metastatic, well-differentiated pancreatic neuroendocrine tumours with disease progression in adults.                               | F | Free/discounted treatment initiation |
| Scotland | Tafinlar | Dabrafenib  | GSK                  | L01XE23 | 0 | March2015  | Unresectable or metastatic melanoma with a BRAF V600 mutation                                                                                                    | F | Discount                             |
| Scotland | Tarceva  | Erlotinib   | Roche                | L01XE03 | 0 | Jan 2012   | Locally advanced or metastatic non-small cell lung cancer with epidermal growth factor receptor activating mutations, first line                                 | F | Discount                             |
| Scotland | Tasigna  | nilotinib   | Novartis             | L01XE08 | 1 | Jan 2012   | Newly diagnosed philadelphia chromosome positive chronic myelogenous leukeamia in the chronic phase                                                              | F | Discount                             |
| Scotland | Vargatef | nintedanib  | Boehringer Ingelheim | L01XE31 | 0 | April 2015 | Locally advanced, metastatic or locally recurrent NSCLC of adenocarcinoma tumor histology after firstline therapy, in combination with docetaxel                 | F | Discount                             |

|          |          |                     |                            |         |   |            |                                                                                                                                                                                              |   |          |
|----------|----------|---------------------|----------------------------|---------|---|------------|----------------------------------------------------------------------------------------------------------------------------------------------------------------------------------------------|---|----------|
| Scotland | Vidaza   | Azacitidine         | Celgene                    | L01BC07 | 1 | Sep 2011   | Chronic myelomonocytic leukemia or acute myeloid leukemia not eligible for haematopoietic stem cell transplantation                                                                          | F | Discount |
| Scotland | Xalkori  | Crizotinib          | Pfizer                     | L01XE16 | 0 | Oct 2013   | Anaplastic lymphoma kinase (ALK)-positive advanced NSCLC, previously treated                                                                                                                 | F | Discount |
| Scotland | Xtandi   | Enzalutamide        | Astellas Pharma Ltd        | L02BB04 | 0 | Nov 2013   | Metastatic castration-resistant prostate cancer (mCRPC) whose disease has progressed on or after docetaxel therapy                                                                           | F | Discount |
| Scotland | Yervoy   | Ipilimumab          | Bristol Myers Squibb       | L01XC11 | 0 | April 2013 | Treatment of advanced (unresectable or metastatic) melanoma after prior therapy                                                                                                              | F | Discount |
| Scotland | Zaltrap  | Aflibercept         | Sanofi                     | L01XX44 | 0 | Feb 2014   | Metastatic colorectal cancer (mCRCC) that is resistant to or has progressed after an oxaliplatin-containing regimen, in combination with irinotecan/5-fluorouracil/folinic acid chemotherapy | F | Discount |
| Scotland | Zelboraf | Vemurafenib         | Roche                      | L01XE15 | 0 | Dec 2013   | Unresectable or metastatic melanoma, positive for BRAF V600 mutation, first line                                                                                                             | F | Discount |
| Scotland | Zydelig  | Idelalisib          | Gilead                     | L01XE15 | 0 | Feb 2015   | Chronic lymphocytic leukemia, in combination with rituximab                                                                                                                                  | F | Discount |
| Scotland | Zydelig  | idelalisib          | Gilead                     | L01XE15 | 0 | March 2015 | Follicular lymphoma that is refractory to two prior lines of treatment                                                                                                                       | F | Discount |
| Scotland | Zykadia  | Ceritinib           | Novartis euoppharm Limited | L01XE28 | 0 | Nov 2015   | Advanced non small cell lung cancer (NSCLC), positive for anaplastic lymphoma kinase (ALK), previously treated with crizotinib                                                               | F | Discount |
| Scotland | Zytiga   | Abiraterone Acetate | Janssen-cilag              | L02BX03 | 0 | Sept 2015  | Metastatic prostate cancer resistant to castration, progressed on or after docetaxel based treatment regimen, in combination with prednison or prednisolon                                   | F | Discount |



|        |           |                     |                         |         |   |              |           |                                                                                                                                                                                                                                                                                    |              |                         |
|--------|-----------|---------------------|-------------------------|---------|---|--------------|-----------|------------------------------------------------------------------------------------------------------------------------------------------------------------------------------------------------------------------------------------------------------------------------------------|--------------|-------------------------|
| Sweden | Mekinist  | Trametinib          | Novartis                | L01XE25 | 0 | July 2016    | dec/17    | Melanoma, combination therapy                                                                                                                                                                                                                                                      | F            | Money-back guarantee    |
| Sweden | Xtandi    | Enzalutamide        | Astellas Pharma         | L02BB04 | 0 | July 2015    | July 2017 | Prostate cancer                                                                                                                                                                                                                                                                    | F            | Patient utilisation cap |
| Sweden | Zykadia   | Ceritinib           | Novartis                | L01XE28 | 0 | Dec 2015     | June 2017 | Non-Small cell lung cancer                                                                                                                                                                                                                                                         | F            | Patient utilisation cap |
| Sweden | Zytiga    | Abiraterone acetate | Janssen-Cilag           | L02BX03 | 0 | June 2015    | June 2017 | Prostate cancer                                                                                                                                                                                                                                                                    | F            | Patient utilisation cap |
| Wales  | Stivarga  | Regorafenib         | Bayer                   | L01XE21 | 0 | July 2015    |           | Treatment of adult patients with unresectable or metastatic gastrointestinal stromal tumours (GIST) who progressed on or are intolerant to prior treatment with imatinib and sunitinib                                                                                             | Confidential | Confidential            |
| Wales  | Velcade   | Bortezomib          | Janssen-Cilag           | L01XX02 | 0 | October 2014 |           | n combination with pegylated liposomal doxorubicin or dexamethasone for the treatment of adult patients with progressive multiple myeloma who have received at least 1 prior therapy and who have already undergone or are unsuitable for haematopoietic stem cell transplantation | P            | Money-back guarantee    |
| Wales  | Degarelix | Firmagon            | Ferring Pharmaceuticals | L02BX02 | 0 | Dec 2012     |           | Advanced hormone-dependent prostate cancer                                                                                                                                                                                                                                         | F            | Discount                |
| Wales  | Imnovid   | Pomalidomide        | Celgene                 | L04AX06 | 1 | Aug 2015     |           | Relapsed and refractory multiple myeloma who have received at least two prior treatment regimens, including both lenalidomide and bortezomib, and have demonstrated disease progression on the last therapy, in combination with dexamethasone                                     | F            | Discount                |

|       |          |           |       |         |   |          |                                                                                                                                                                                                                                                                                                                                                                                                                                             |   |                   |
|-------|----------|-----------|-------|---------|---|----------|---------------------------------------------------------------------------------------------------------------------------------------------------------------------------------------------------------------------------------------------------------------------------------------------------------------------------------------------------------------------------------------------------------------------------------------------|---|-------------------|
| Wales | Mabthera | Rituximab | Roche | L01XC02 | 0 | Jan 2015 | Non-Hodgkin's lymphoma, treatment of previously untreated patients with stage III-IV follicular lymphoma in combination with chemotherapy; maintenance therapy for the treatment of follicular lymphoma patients responding to induction therapy; and treatment of patients with CD20 positive diffuse large B cell non-Hodgkin's lymphoma in combination with CHOP (cyclophosphamide, doxorubicin, vincristine, prednisolone) chemotherapy | F | Discount          |
| Wales | Tyvverb  | Lapatinib | GSK   | L01XE07 | 0 | Aug 2013 | Breast cancer, whose tumours overexpress HER2 (ErbB2), in combination with capecitabine for patients with advanced or metastatic disease with progression following prior therapy, which must have included anthracyclines and taxanes and therapy with trastuzumab in the metastatic setting                                                                                                                                               | F | Discount          |
| Wales | Votrient | Pazopanib | GSK   | L01XE11 | 0 | Dec 2013 | Advanced soft tissue sarcoma who have received prior chemotherapy for metastatic disease or who have progressed within 12 months after (neo) adjuvant therapy                                                                                                                                                                                                                                                                               | F | Discount + rebate |
